# Supplementary material for: Bandgap bowing in a zero-dimensional hybrid halide perovskite derivative: spin–orbit coupling versus lattice strain
Source: Royal Society of Chemistry journal article supplement (doi:10.1039/c9ta12263j), 2020-01-01
Supplement: c9ta12263j1.pdf [file c9ta12263j1.pdf]

## Supporting Information

Bandgap bowing in a zero-dimensional hybrid halide perovskite derivative:  
spin-orbit coupling versus lattice strain†

Soumyo Chatterjee,<sup>1</sup> Julia Payne,<sup>2</sup> John T. S. Irvine,<sup>2</sup> and Amlan J. Pal\*<sup>1</sup>

<sup>1</sup> School of Physical Sciences, Indian Association for the Cultivation of Science, Jadavpur,  
Kolkata 700032, India

<sup>2</sup> School of Chemistry, University of St Andrews, Scotland KY16 9ST, UK

E-mail: sspajp@iacs.res.in

**Table S1** Unit cell parameters of MA<sub>3</sub>(Sb<sub>1-x</sub>Bi<sub>x</sub>)<sub>2</sub>I<sub>9</sub> (0 ≤ x ≤ 1) obtained from XRD patterns fitted using Pawley refinement.

| Bi-content (x) in<br>MA <sub>3</sub> (Sb <sub>1-x</sub> Bi <sub>x</sub> ) <sub>2</sub> I <sub>9</sub> | Lattice parameters |           | Unit cell volume (Å) <sup>3</sup> |
|-------------------------------------------------------------------------------------------------------|--------------------|-----------|-----------------------------------|
|                                                                                                       | a = b (Å)          | c (Å)     |                                   |
| 0.0                                                                                                   | 8.611(2)           | 21.458(2) | 1378.8(4)                         |
| 0.1                                                                                                   | 8.548(1)           | 21.530(2) | 1362.4(4)                         |
| 0.2                                                                                                   | 8.559(2)           | 21.529(3) | 1365.9(6)                         |
| 0.3                                                                                                   | 8.549(1)           | 21.547(1) | 1363.8(3)                         |
| 0.4                                                                                                   | 8.562(2)           | 21.578(2) | 1370.1(5)                         |
| 0.5                                                                                                   | 8.545(2)           | 21.597(2) | 1365.9(5)                         |
| 0.6                                                                                                   | 8.546(3)           | 21.620(1) | 1368.0(4)                         |
| 0.7                                                                                                   | 8.547(2)           | 21.635(2) | 1371.8(7)                         |
| 0.8                                                                                                   | 8.573(2)           | 21.670(2) | 1379.4(6)                         |
| 0.9                                                                                                   | 8.568(1)           | 21.704(1) | 1383.1(3)                         |
| 1.0                                                                                                   | 8.605(2)           | 21.737(1) | 1394.0(4)                         |

**Table S2** Band energies and transport gap of  $\text{MA}_3(\text{Sb}_{1-x}\text{Bi}_x)_2\text{I}_9$  ( $0 \leq x \leq 1$ ) composites obtained from STS measurements and DOS spectra.

| <b>Bi-content (<math>x</math>) in<br/><math>\text{MA}_3(\text{Sb}_{1-x}\text{Bi}_x)_2\text{I}_9</math></b> | <b>CB-edge (eV)</b> | <b>VB-edge (eV)</b> | <b>Transport gap (eV)</b> |
|------------------------------------------------------------------------------------------------------------|---------------------|---------------------|---------------------------|
| 0.0                                                                                                        | -1.37               | 1.23                | 2.60                      |
| 0.1                                                                                                        | -1.27               | 1.21                | 2.48                      |
| 0.2                                                                                                        | -1.18               | 1.19                | 2.37                      |
| 0.3                                                                                                        | -1.14               | 1.16                | 2.30                      |
| 0.4                                                                                                        | -1.11               | 1.15                | 2.26                      |
| 0.5                                                                                                        | -1.09               | 1.13                | 2.22                      |
| 0.6                                                                                                        | -1.23               | 1.19                | 2.42                      |
| 0.7                                                                                                        | -1.28               | 1.23                | 2.51                      |
| 0.8                                                                                                        | -1.30               | 1.24                | 2.54                      |
| 0.9                                                                                                        | -1.33               | 1.24                | 2.57                      |
| 1.0                                                                                                        | -1.34               | 1.25                | 2.59                      |

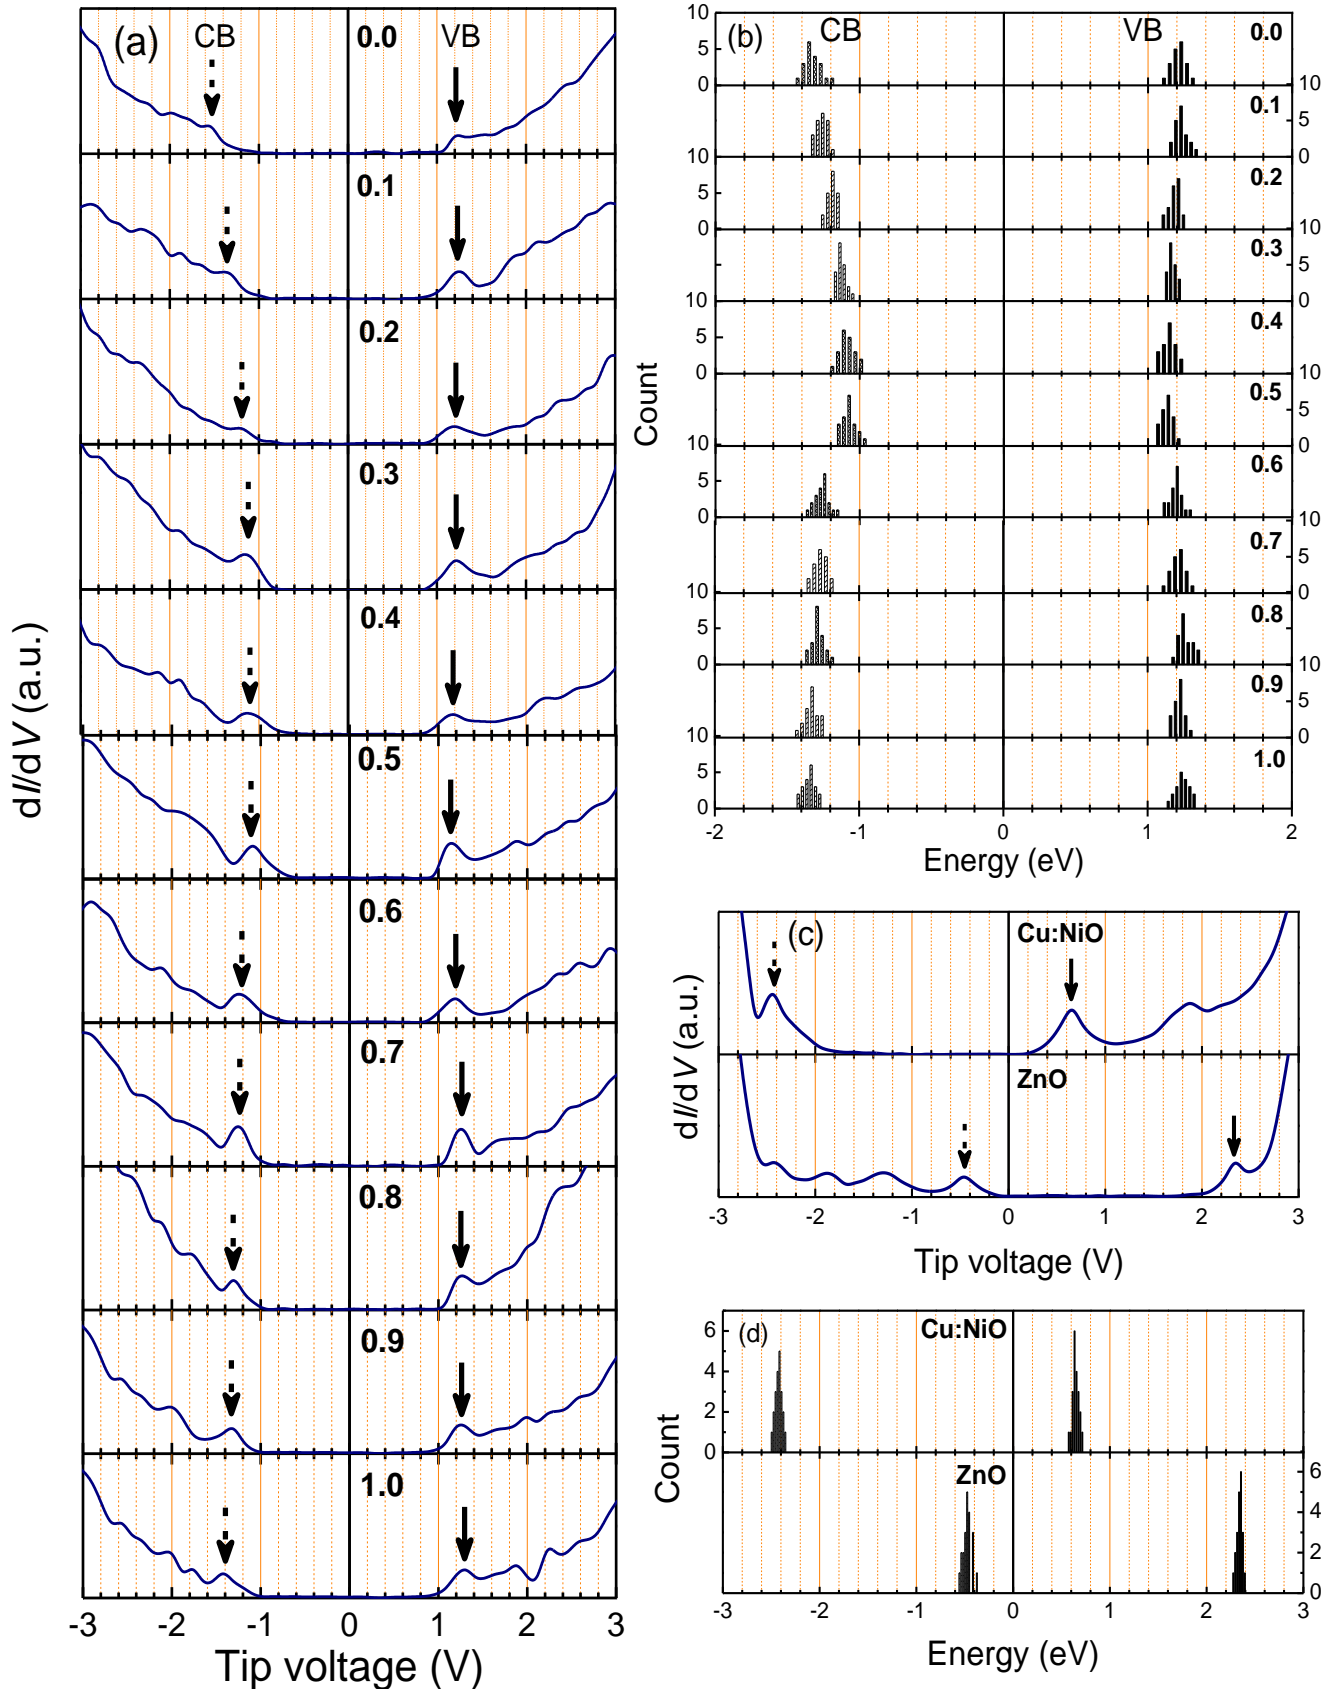

**Fig. S1** (a)  $dI/dV$  versus tip voltage plots of  $MA_3(Sb_{1-x}Bi_x)_2I_9$  thin-films with different bismuth-content ( $x$ ) as stated in the legends, and (b) respective histogram of CB and VB edges, (c) and (d) present  $dI/dV$  versus tip voltage plots and histogram of CB and VB edges of Cu:NiO and ZnO carrier selective contacts, respectively.

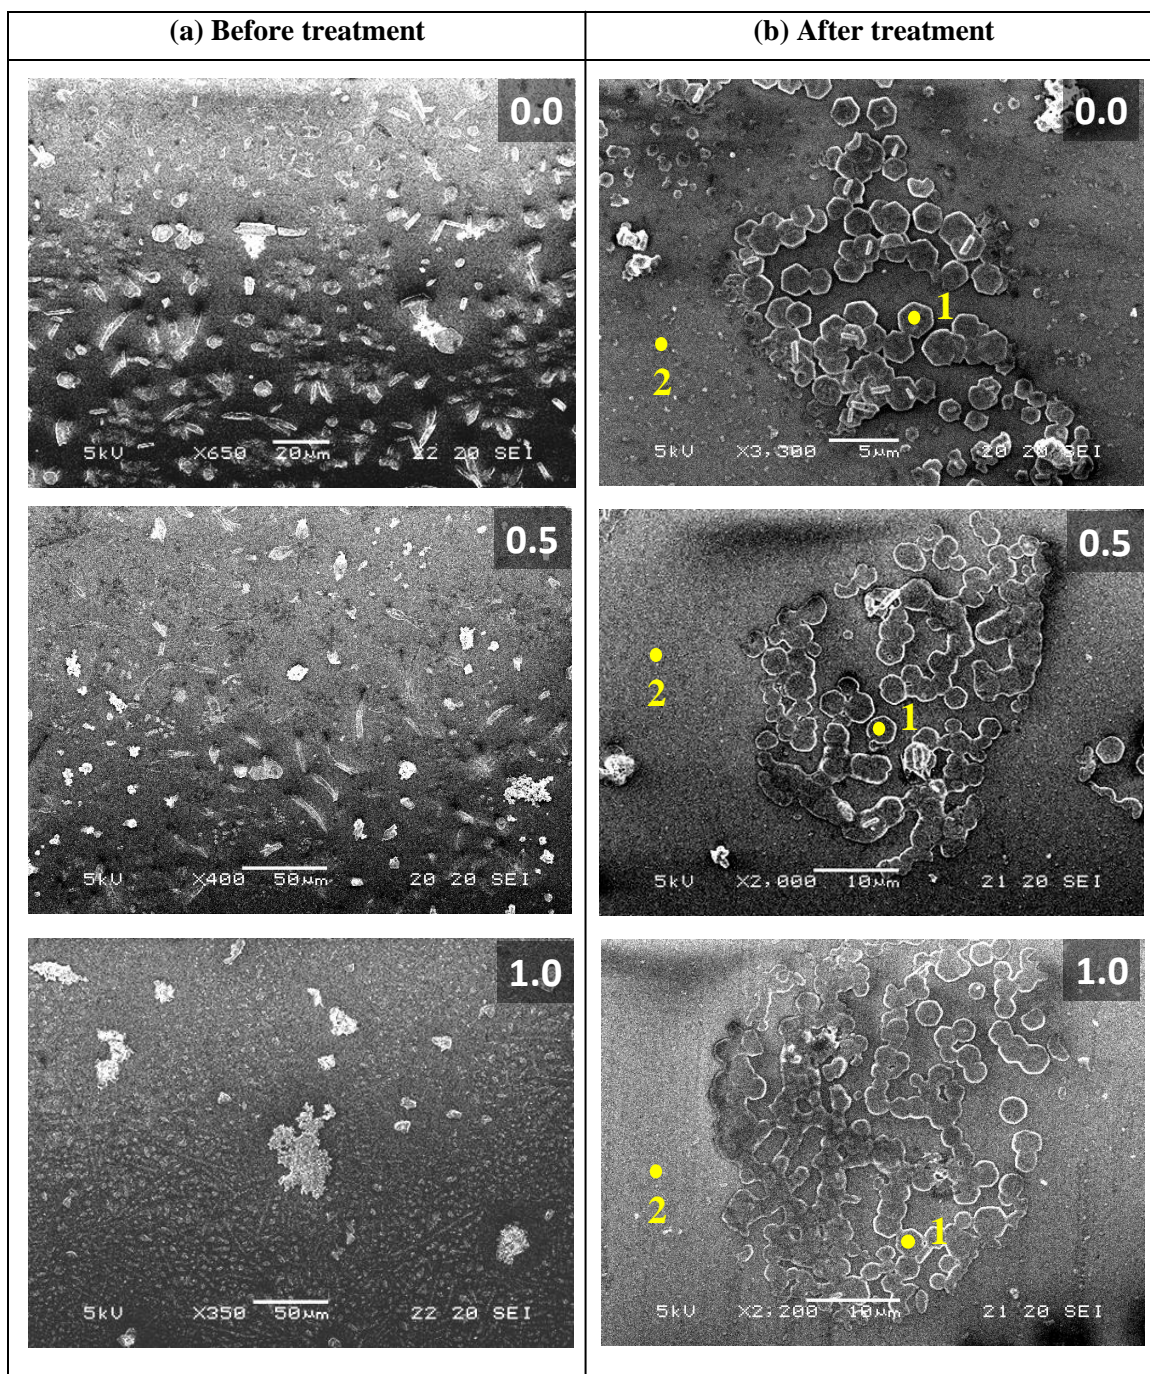

**Fig. S2** SEM images of  $\text{MA}_3(\text{Sb}_{1-x}\text{Bi}_x)_2\text{I}_9$  films having bismuth-content ( $x$ ) as specified in the legends (a) before and (b) after chlorobenzene treatment. The points of EDX measurement have been marked with yellow dots and numbers.

**Table S3** Distribution (atomic %) of individual elements observed on particular spots of  $\text{MA}_3(\text{Sb}_{1-x}\text{Bi}_x)_2\text{I}_9$  thin-films having specified bismuth-content ( $x$ ).

| Bi-content ( $x$ ) in $\text{MA}_3(\text{Sb}_{1-x}\text{Bi}_x)_2\text{I}_9$ | Position         | Elements |      |      | Ratio |           |
|-----------------------------------------------------------------------------|------------------|----------|------|------|-------|-----------|
|                                                                             |                  | Sb L     | Bi M | I L  | Sb/Bi | I/(Bi+Sb) |
| 0.0                                                                         | Point 1: Hexagon | 0.0      | 22.2 | 77.8 | –     | 3.6       |
|                                                                             | Point 2: Film    | 0.0      | 6.3  | 93.7 | –     | 14.3      |
| 0.5                                                                         | Point 1: Hexagon | 10.4     | 11.5 | 78.1 | 0.9   | 3.6       |
|                                                                             | Point 2: Film    | 3.5      | 5.4  | 91.1 | 0.6   | 10.0      |
| 1.0                                                                         | Point 1: Hexagon | 21.5     | 0.0  | 78.5 | –     | 3.7       |
|                                                                             | Point 2: Film    | 13.9     | 0.0  | 86.1 | –     | 6.2       |

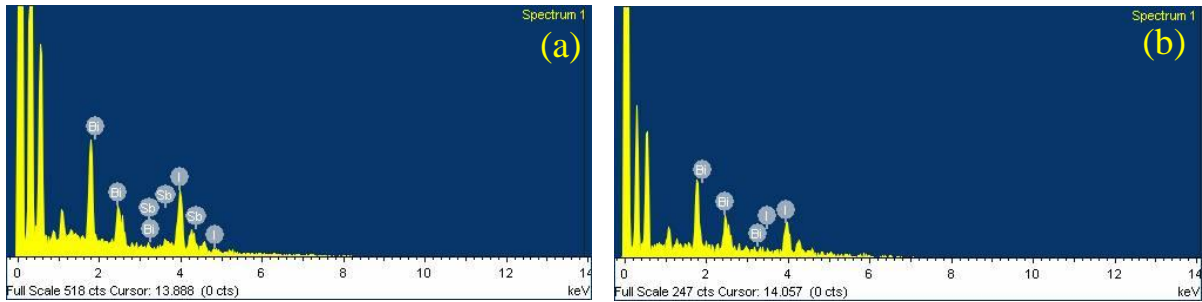

**Fig. S3** EDX spectra of  $\text{MA}_3(\text{Sb}_{0.5}\text{Bi}_{0.5})_2\text{I}_9$  thin-films taken on the (a) Point 1: hexagon and (b) Point 2: film, respectively.

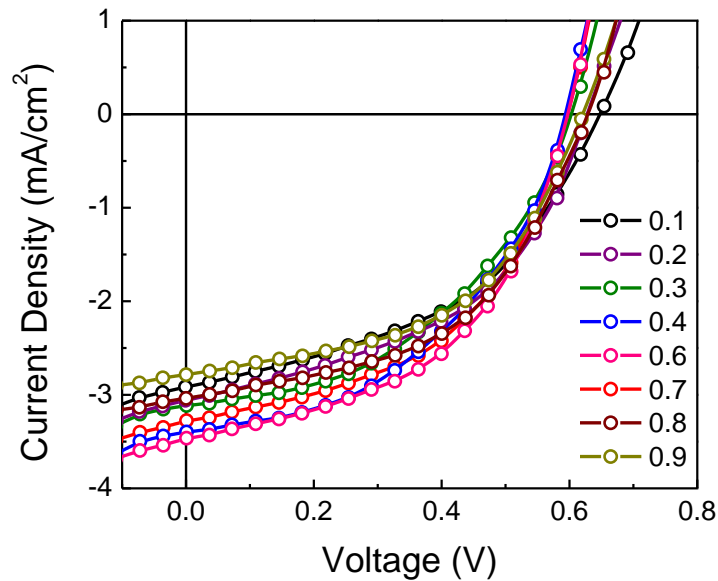

**Fig. S4** Current-voltage characteristics of  $\text{MA}_3(\text{Sb}_{1-x}\text{Bi}_x)_2\text{I}_9$  with bismuth-contents ( $x$ ) as specified in the legends (under 1 sun illumination).
